# Supplementary material for: Wiping conditions and fabric properties influenced the microfiber shedding from non-woven products
Source: Royal Society of Chemistry journal article supplement (doi:10.1039/d2em00292b), 2022-01-01
Supplement: d2em00292b1.pdf [file d2em00292b1.pdf]

1 **Supporting Information**

2

3 **Wiping conditions and fabric properties influenced the microfibers shedding**  
4 **from non-woven products**

5

6 Fang Li <sup>a,b</sup>, Yifan Ni <sup>a</sup>, Junhao Cong <sup>a</sup>, Chensi Shen <sup>a</sup>, Peng Ji <sup>c</sup>, Huaping Wang <sup>c</sup>,  
7 Lanjun Yin <sup>d</sup>, Chenye Xu <sup>a\*</sup>

8

9 <sup>a</sup> College of Environmental Science and Engineering, Donghua University, Shanghai,  
10 201620, China

11 <sup>b</sup> Shanghai Institute of Pollution Control and Ecological Security, Shanghai, 200092,  
12 China

13 <sup>c</sup> College of Materials Science and Engineering, Innovation Center for Textile Science  
14 and Technology, Donghua University, Shanghai, 201620, China

15 <sup>d</sup> Shenzhen Purcotton Technology Co., Ltd, Shenzhen, 518053, China

16

17

18

19

20

21 Corresponding author: Chenye Xu

22 Email: xcy0714@dhu.edu.cn

**Table S1** Detailed comparison of the existing work relating microfibers from non-woven products

| Reference                          | Wiping material                   | Objective                                                                                                  | Factors influencing microfibers shed from wiping                                    | Analysis of microfibers                               |
|------------------------------------|-----------------------------------|------------------------------------------------------------------------------------------------------------|-------------------------------------------------------------------------------------|-------------------------------------------------------|
| Lee et al. (2021) <sup>1</sup>     | Wet wipes                         | Explore the discharge of microplastics fibers from wet wipes in aquatic and solid environments             | Moisture content and wiping condition (rubbed on the glove or immersed in DI water) | Length, release number and polymer composition        |
| Durukan et al. (2019) <sup>2</sup> | Non-woven wipes and toilet papers | Explore factors of non-woven wipes and toilet papers in relevance to what is flushable                     | None                                                                                | Tensile properties, colours, shapes and polymer types |
| Kwon et al. (2022) <sup>3</sup>    | Wipes and meltblown nonwovens     | Confirm shedding situation of microfibers from wipes and meltblown nonwovens in air and water environments | None                                                                                | Width, release number and polymer composition         |

**Table S2** Detailed information of 7 wet wipes and 5 dry wipes.

| Abbreviation | Condition | Purchase time |
|--------------|-----------|---------------|
| W1           | Wet       | 2021.07       |
| W2           | Wet       | 2021.07       |
| W3           | Wet       | 2021.07       |
| W4           | Wet       | 2021.07       |
| W5           | Wet       | 2021.07       |
| W6           | Wet       | 2021.07       |
| W7           | Wet       | 2021.07       |
| D1           | Dry       | 2021.07       |
| D2           | Dry       | 2021.07       |
| D3           | Dry       | 2021.07       |
| D4           | Dry       | 2021.07       |
| D5           | Dry       | 2021.07       |

**Table S3** Detailed information of 4 masks and 2 wipes for comparison.

| Type                  | Abbreviation | Condition | Purchase time |
|-----------------------|--------------|-----------|---------------|
| Surgical mask         | M1           | Dry       | 2020.09       |
| Activated carbon mask | M2           | Dry       | 2021.05       |
| Activated carbon mask | M3           | Dry       | 2021.05       |
| KN95 mask             | M4           | Dry       | 2021.05       |
| Wet wipe              | W2           | Wet       | 2020.10       |
| Dry wipe              | D3           | Dry       | 2021.01       |

**Table S4** Density for different microfibers

| Composition                      | Density (kg/m <sup>3</sup> ) |
|----------------------------------|------------------------------|
| Cellulose                        | 1260                         |
| Polyethylene terephthalate (PET) | 1370                         |
| Polypropylene (PP)               | 900                          |

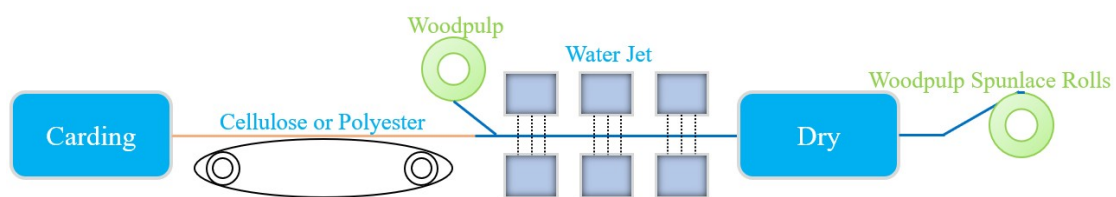

(A) Spunlacing

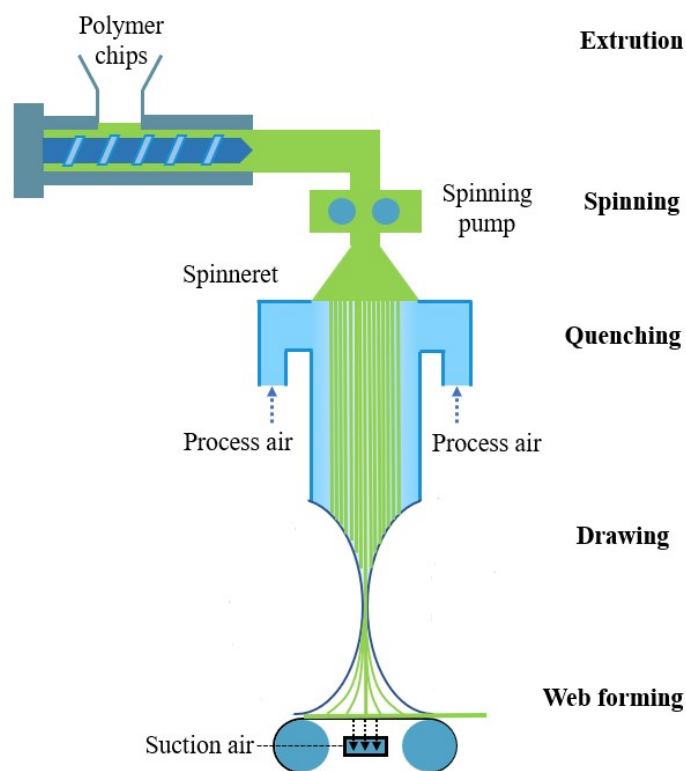

(B) Spunbonding

**Figure S1** Schematic diagram of non-woven fabrics manufacturing process. (A) Spunlacing (B) Spunbonding

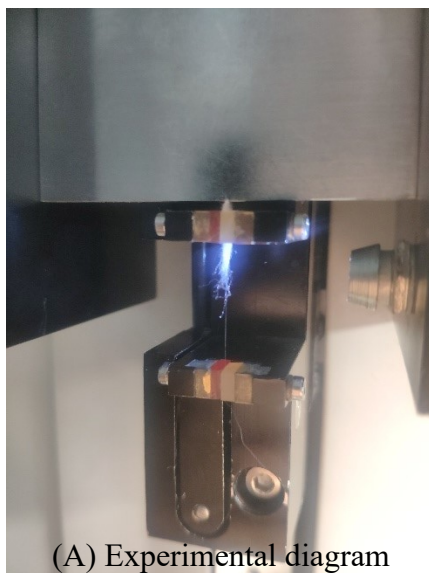

(A) Experimental diagram

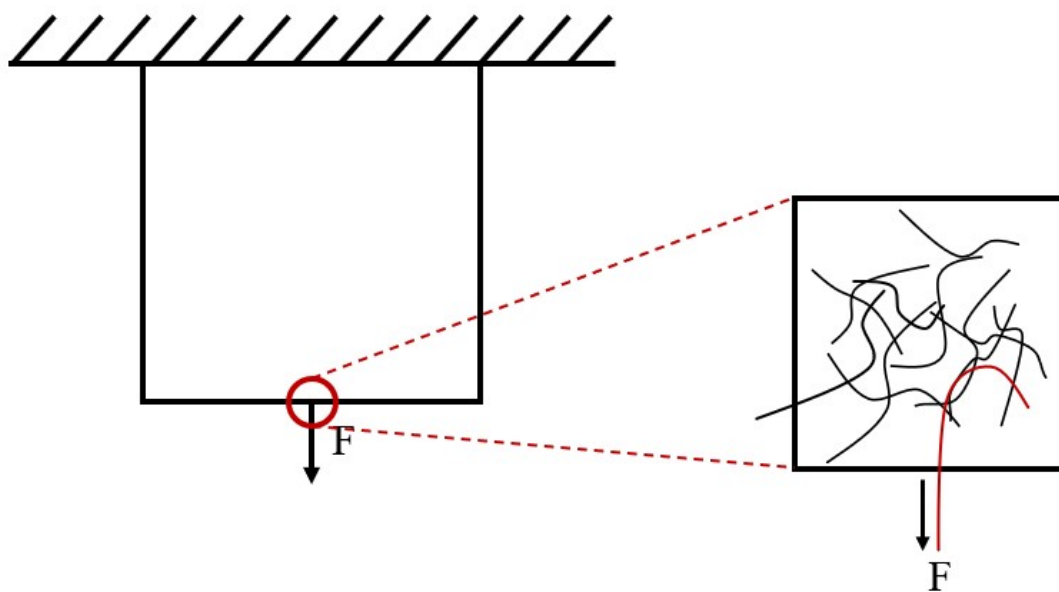

(B) Sketch Map

**Figure S2** Schematic diagram of fiber extraction experiment for wipes. (A) Experimental diagram (B) Sketch Map

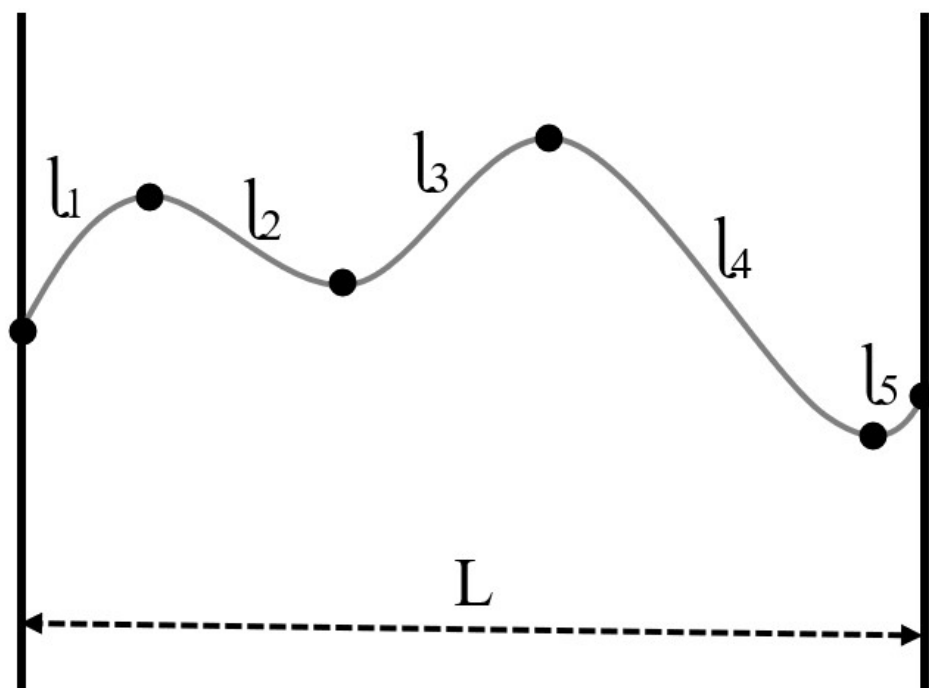

**Figure S3** Calculation of bending coefficient



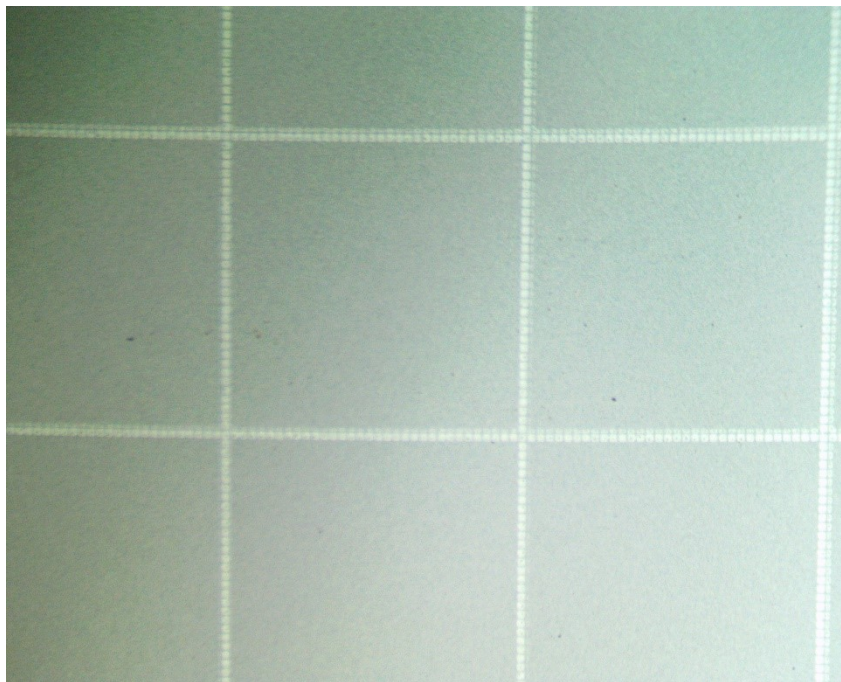

**Figure S4** Membrane for the control experiment

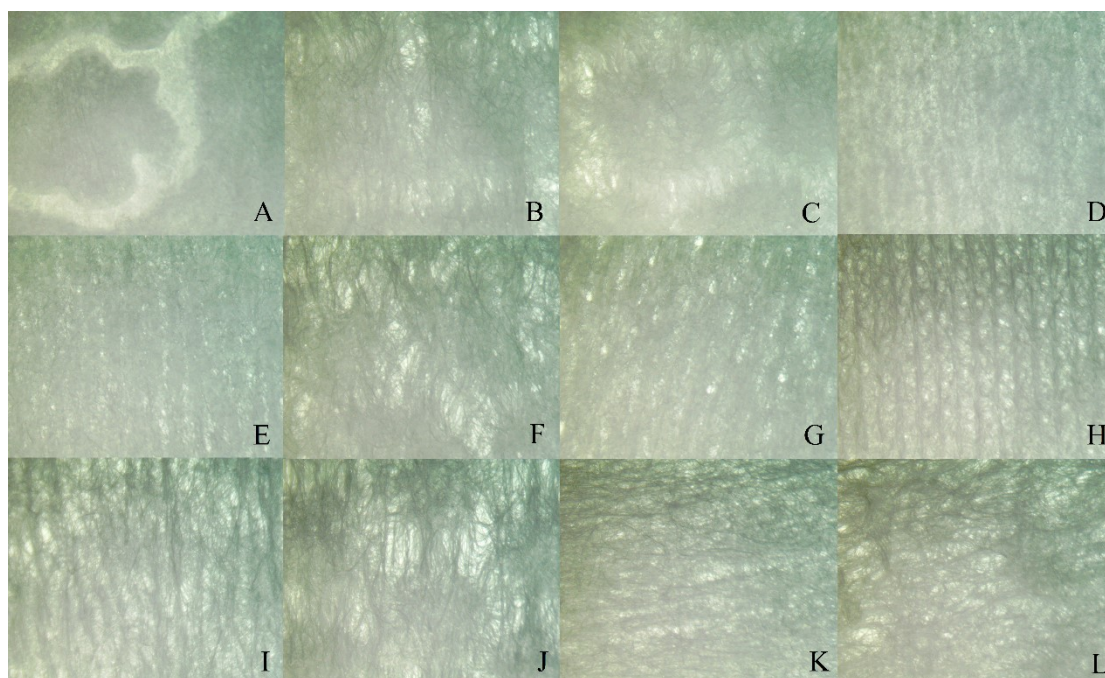

**Figure S5** Imaging of wet and dry wipes under 40 times magnification of stereoscope.

(A)W1, (B) W2, (C) W3, (D) W4, (E) W5, (F) W6, (G) W7, (H) D1, (I) D2, (J) D3,  
(K) D4, (L) D5

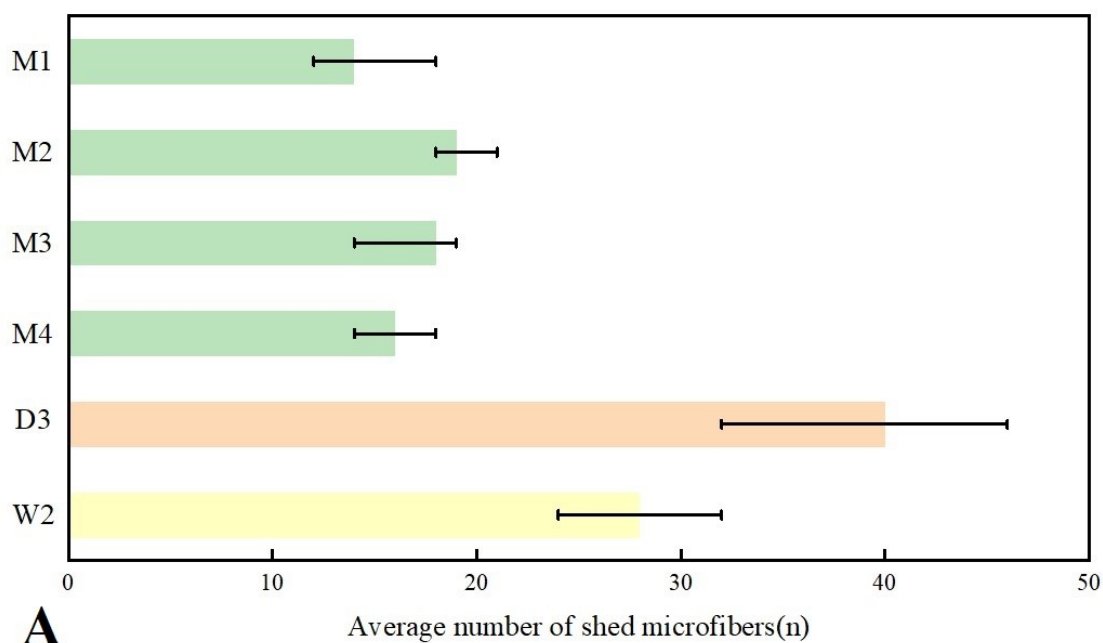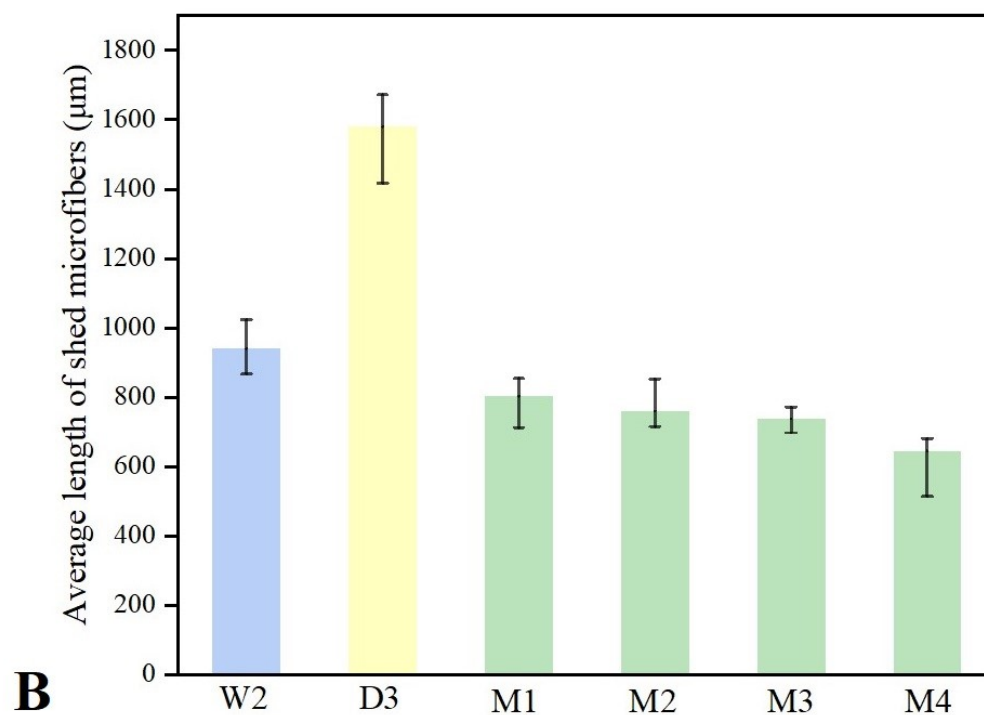

**Figure S6** Average number (A) and length (B) of microfibers shed from masks, wet and dry wipes under a 3.92 N wiping force and 10 wiping times.

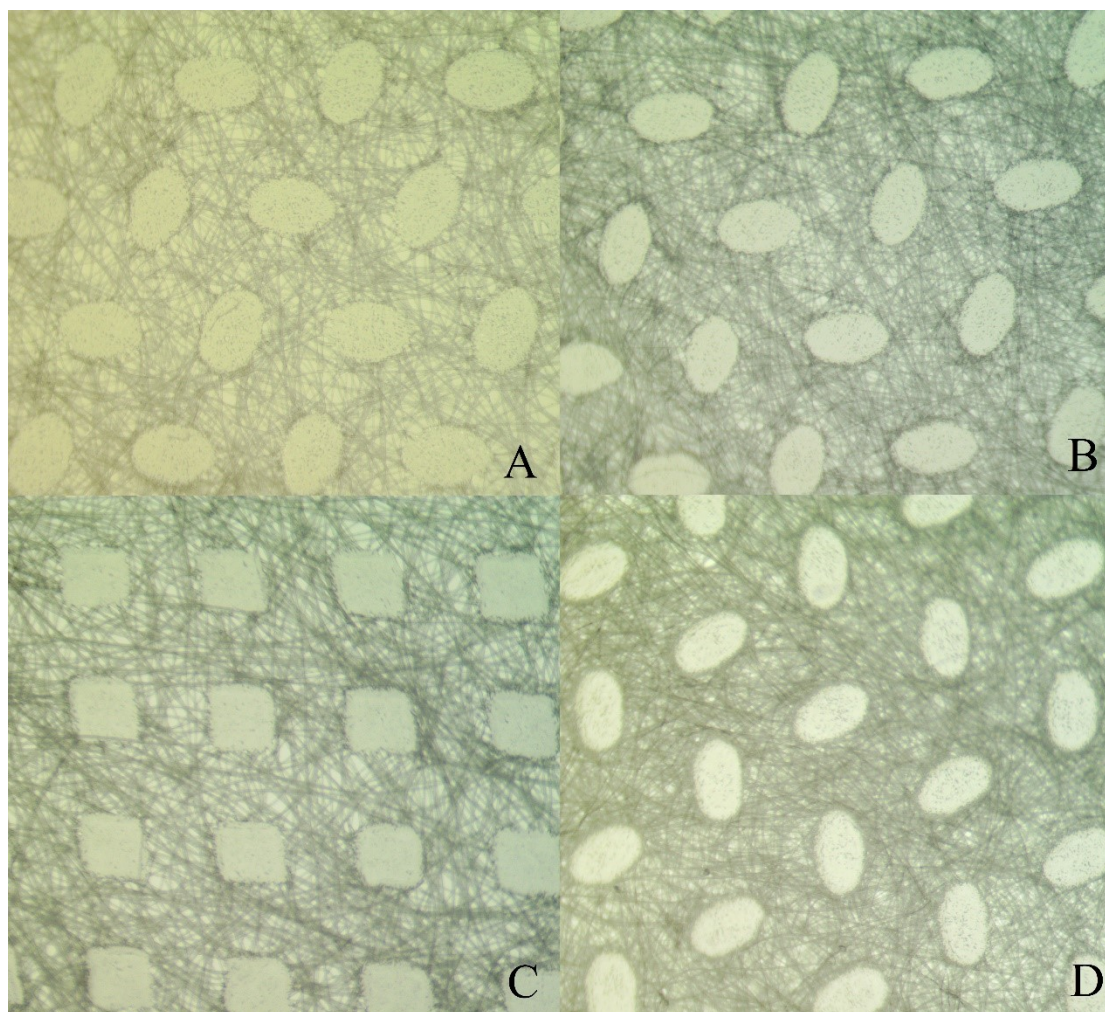

**Figure S7** Imaging of masks under 40 times magnification of stereoscope. (A) M1 (B) M2 (C) M3 (D) M4



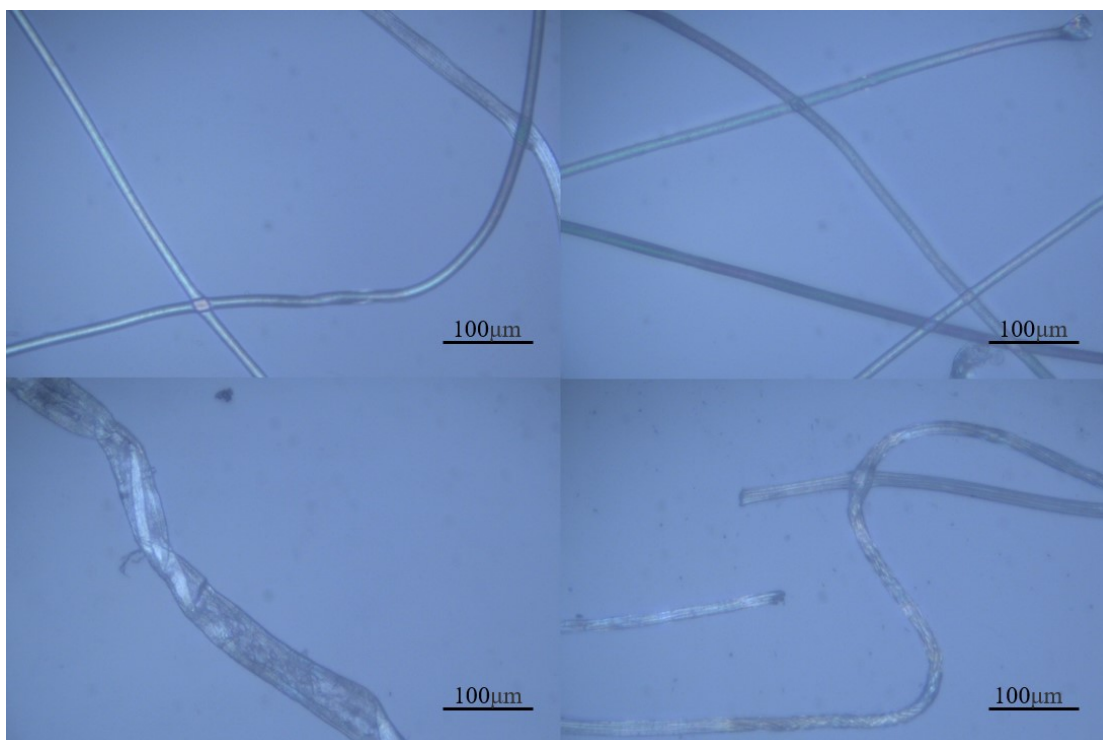

**Figure S8** Imaging of exfoliated microfibers under optical microscope (transmission mode)

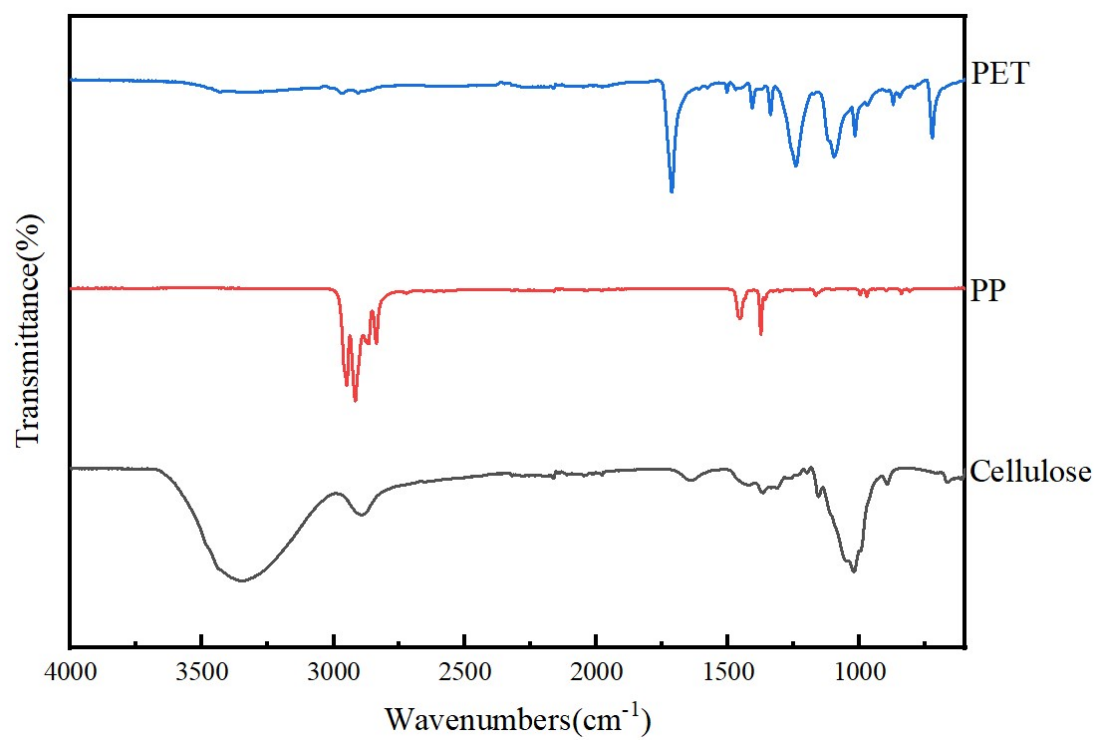

**Figure S9** Main infrared matching results of raw wipes and masks

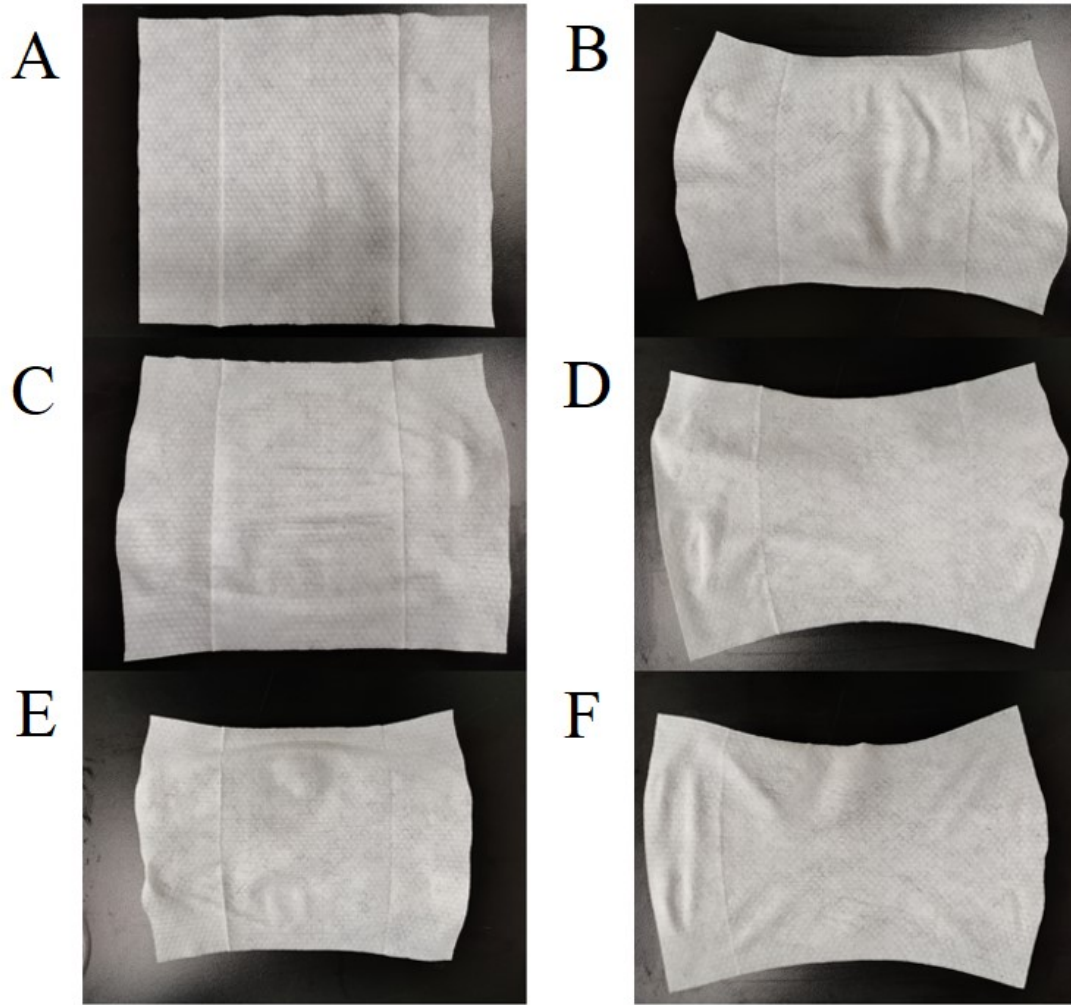

**Figure S10** Deformation of the wet wipe under different wiping times and wiping forces. (A) non-wiped, (B) after the wiping process (0.98N, n=10), (C) after the wiping process (3.92N, n=10), (D) after the wiping process (6.86N, n=10), (E) after the wiping process (9.8N, n=10), (F) after the wiping process (3.92N, n=55)

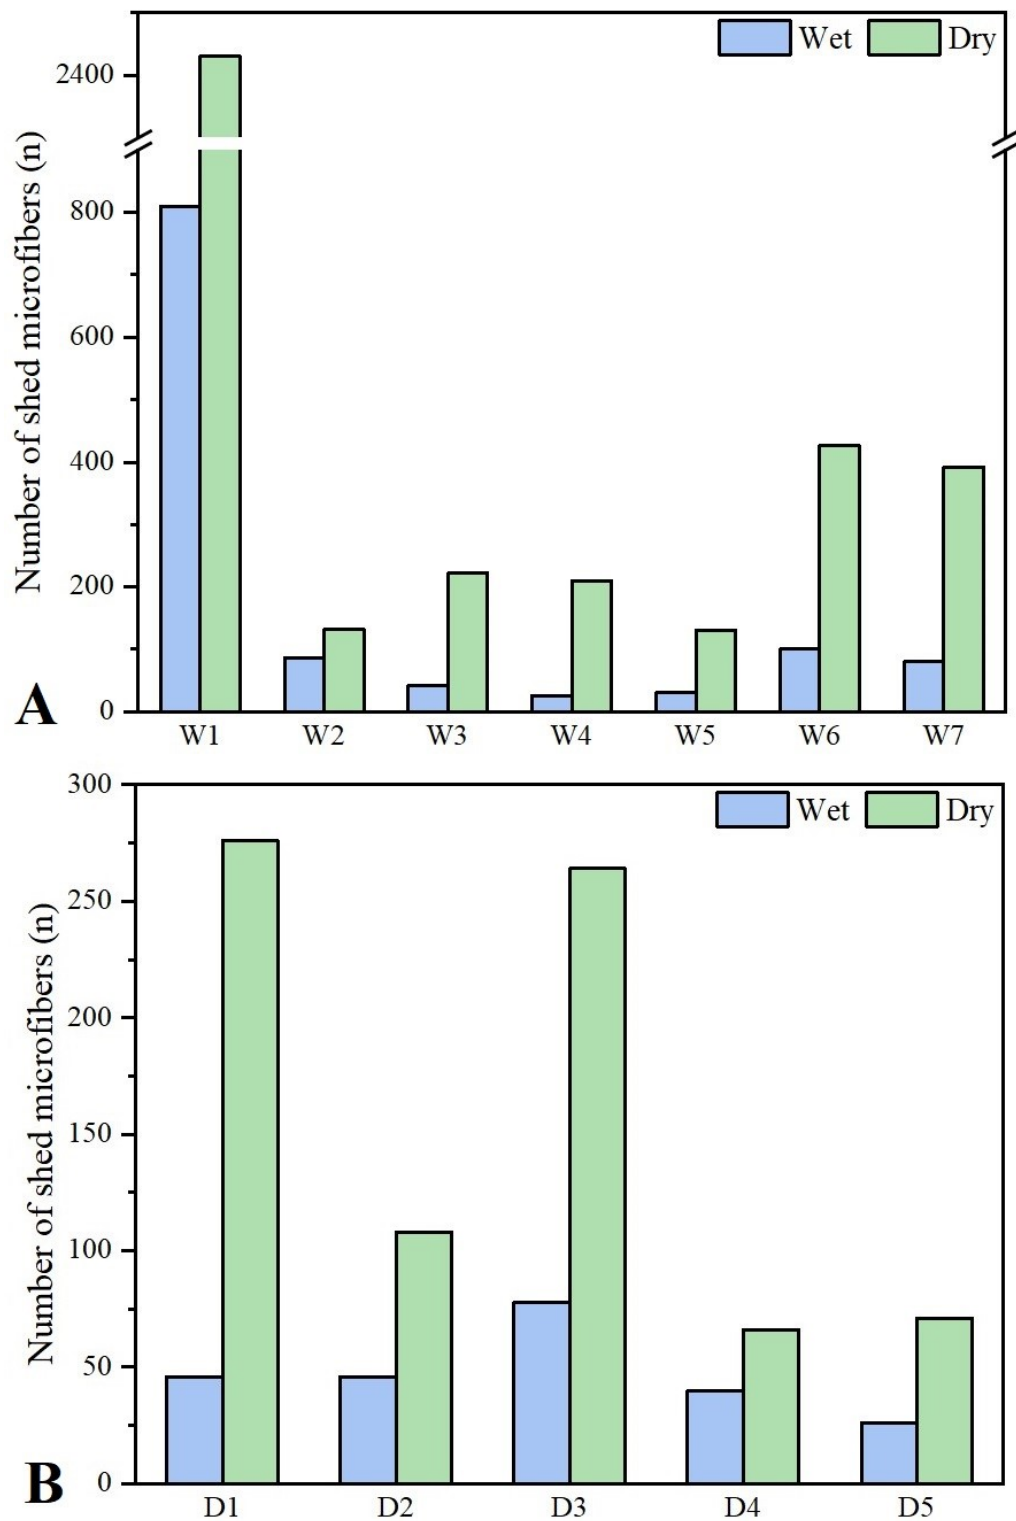

**Figure S11** Number of microfibers shed in the wiping process of wet wipes (A) and dry wipes (b) under wet or dry conditions. (10 times, 9.8 N)



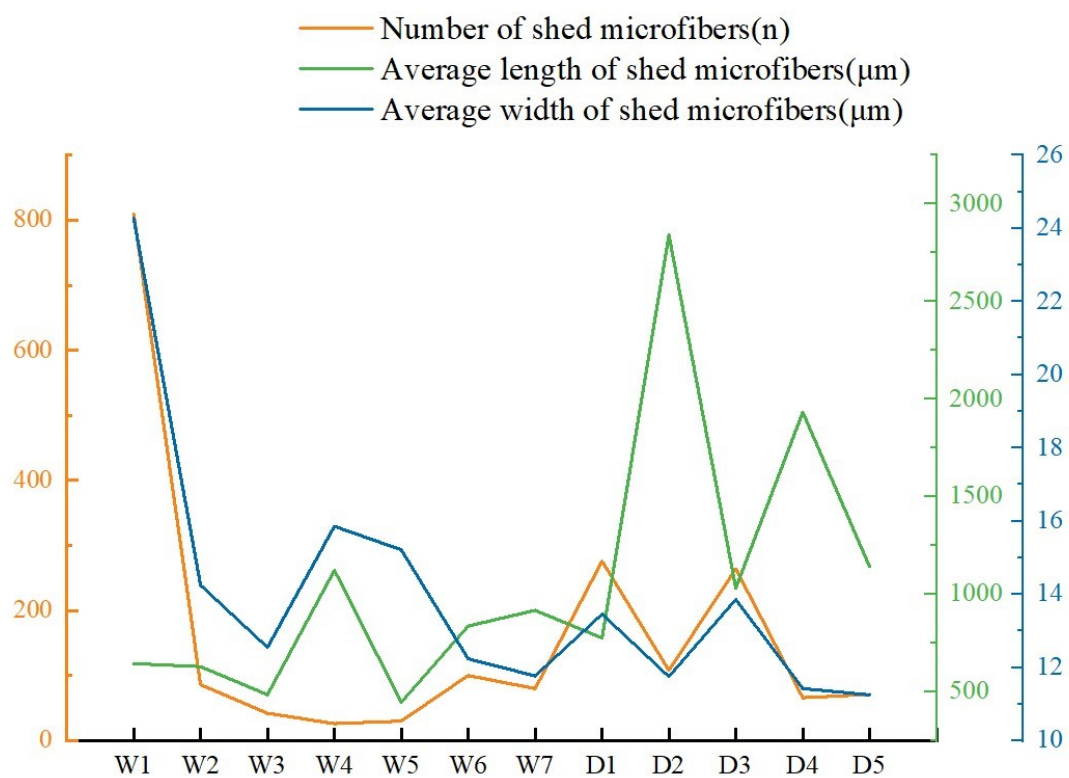

**Figure S12** Length, width and quantity of exfoliated microfibers from 12 wipes

## Reference:

1. J. Lee, S. Jeong and K.-J. Chae, Discharge of microplastics fibres from wet wipes in aquatic and solid environments under different release conditions, *Science of The Total Environment*, 2021, **784**, 147144.
2. S. Durukan and F. Karadagli, Physical characteristics, fiber compositions, and tensile properties of nonwoven wipes and toilet papers in relevance to what is flushable, *Science of The Total Environment*, 2019, **697**, 134135.
3. S. Kwon, M. C. Zambrano, R. A. Venditti, R. Frazier, F. Zambrano, R. W. Gonzalez and J. J. Pawlak, Microfiber shedding from nonwoven materials including wipes and meltblown nonwovens in air and water environments, *Environmental Science and Pollution Research*, 2022, DOI: 10.1007/s11356-022-20053-z.
